# Supplementary material for: Buffalo Milk Whey Activates Necroptosis and Apoptosis in a Xenograft Model of Colorectal Cancer
Source: MDPI journal article supplement (doi:10.3390/ijms23158464), 2022-07-30
Supplement: s1 [file s1]

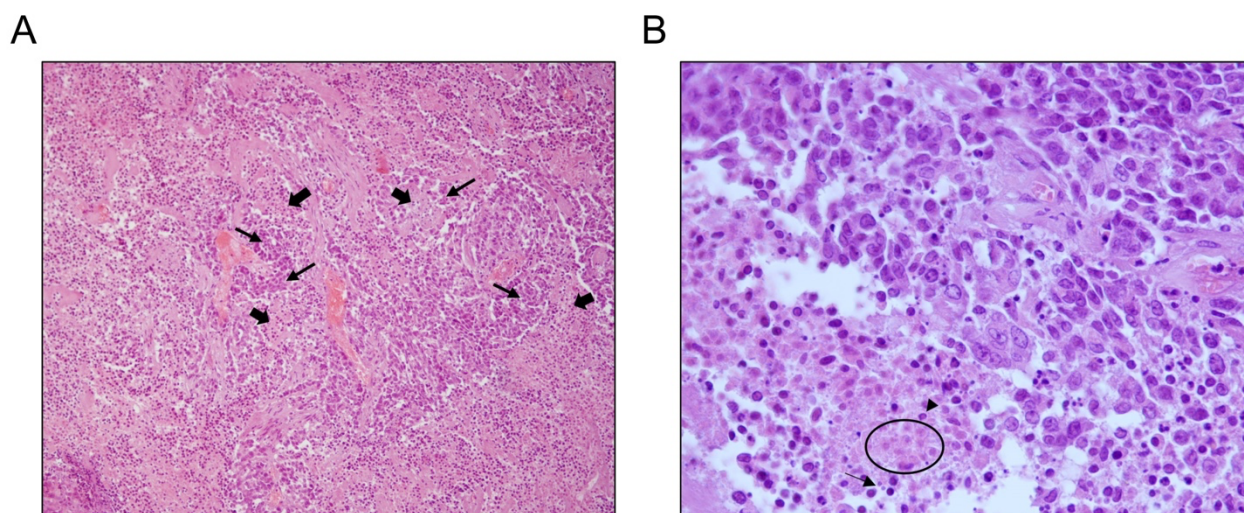

**Figure S1. (A)** Xenograft tissue from DMW-treated mice showed necrosis (thick arrows) invading small neoplastic areas and single neoplastic cells (thin arrows) **(B)** Xenograft tissue from DMW-treated mice showed neoplastic cells with clear signs of pyknosis (arrowhead), karyorrhexis (arrow) and karyolysis (ghost cells) (circle). (H-E; original magnification  $\times 10$ ).

**Supplementary Table S1.** Necrosis entity in xenograft tumour tissue from DMW-treated or untreated mice.

| NUMBER OF SAMPLES | NECROSIS ENTITY |
|-------------------|-----------------|
| <b>Control</b>    |                 |
| 7                 | MILD            |
| 3                 | MODERATE        |
| 1                 | SEVERE          |
| <b>DMW</b>        |                 |
| 3                 | MILD            |
| 3                 | MODERATE        |
| 5                 | SEVERE          |
